# Supplementary material for: Solution-processed indium-free ZnO/SnO2 bilayer heterostructures as a low-temperature route to high-performance metal oxide thin-film transistors with excellent stabilities
Source: Royal Society of Chemistry journal article supplement (doi:10.1039/c6tc03977d), 2016-01-01
Supplement: c6tc03977d1.pdf [file c6tc03977d1.pdf]

## Supplementary Information

### **Solution-processed indium-free ZnO/SnO<sub>2</sub> bilayer heterostructures as a low-temperature route to high-performance metal oxide thin-film transistors with excellent stabilities**

Sooji Nam,<sup>\*a</sup> Jong-Heon Yang,<sup>a</sup> Sung Haeng Cho,<sup>a</sup> Ji Hun Choi,<sup>a</sup> Oh-Sang Kwon,<sup>a</sup> Eun-Suk Park,<sup>a</sup> Su-Jae Lee,<sup>a</sup> Kyoung-Ik Cho,<sup>a</sup> Jaeyoung Jang,<sup>b</sup> and Chi-Sun Hwang<sup>\*a</sup>

<sup>a</sup>Information Control Device Research Section, Electronics and Telecommunications Research Institute (ETRI), Daejeon, 305-700, Korea

\*E-mail: [sjnam15@etri.re.kr](mailto:sjnam15@etri.re.kr); [hwang-cs@etri.re.kr](mailto:hwang-cs@etri.re.kr)

<sup>b</sup>Dept. of Energy Engineering, Hanyang University, Seoul, 133-791, Korea

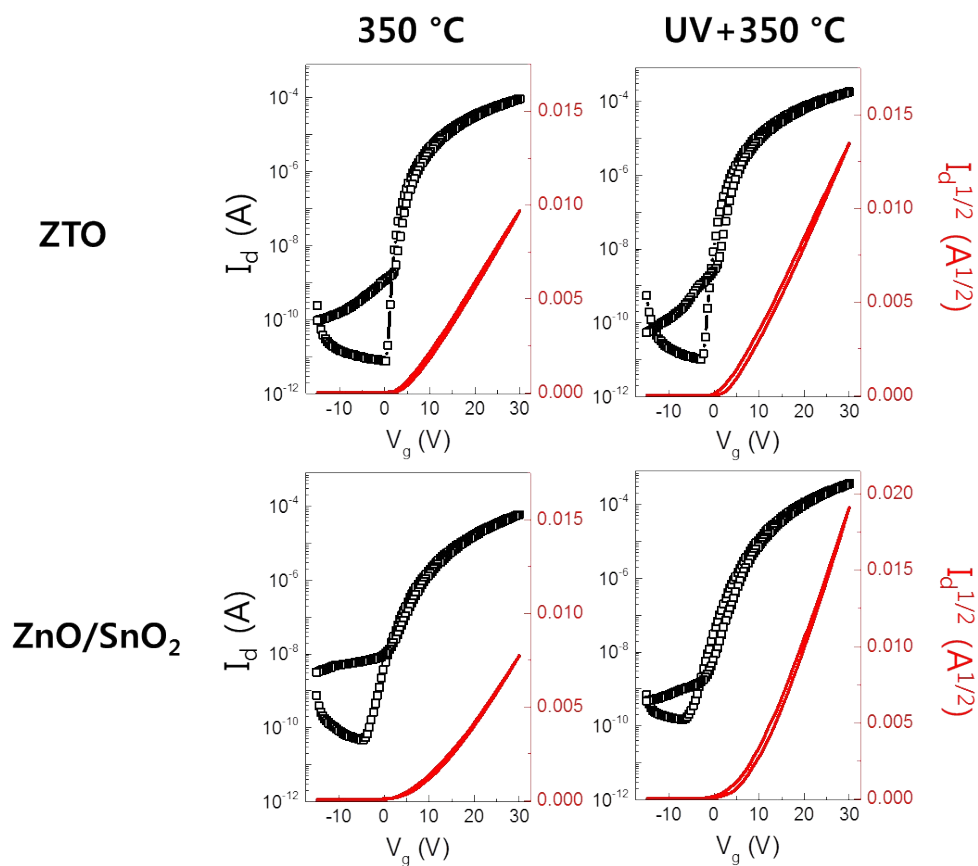

**Fig. S1** A comparison of the device characteristics measured from single layer ZTO and ZnO/SnO<sub>2</sub> bilayer TFTs annealed at 350°C with or without UV treatment prior to thermal treatment. The average  $\mu$  measured from the ZTO TFTs prepared with or without UV treatment were found to be 1.8 cm<sup>2</sup> V<sup>-1</sup> s<sup>-1</sup> or 3.4 cm<sup>2</sup> V<sup>-1</sup> s<sup>-1</sup>, respectively. The average  $\mu$  measured from the ZnO/SnO<sub>2</sub> TFTs prepared with or without UV treatment were found to be 2.2 cm<sup>2</sup> V<sup>-1</sup> s<sup>-1</sup> or 10.4 cm<sup>2</sup> V<sup>-1</sup> s<sup>-1</sup>, respectively.

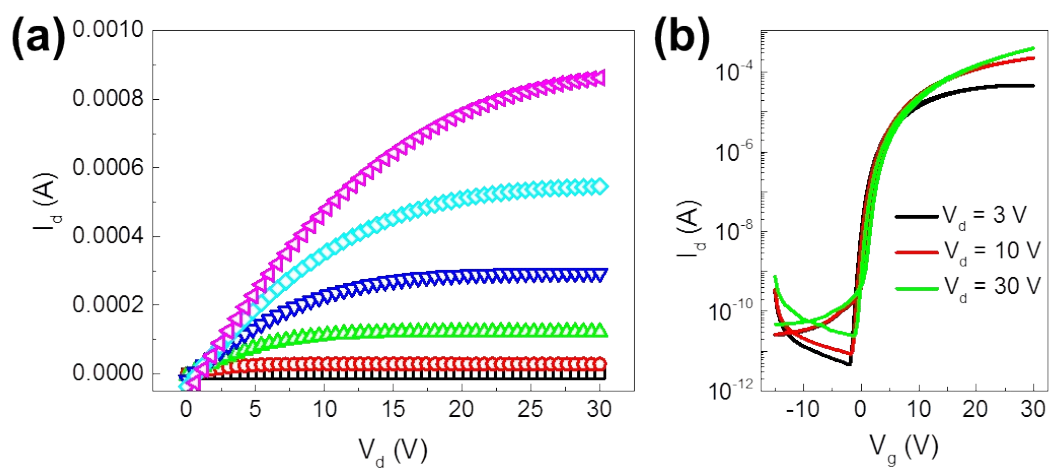

**Fig. S2** Output characteristics and transfer characteristics at different drain voltages applied to the ZnO/SnO<sub>2</sub> TFTs annealed at 300°C

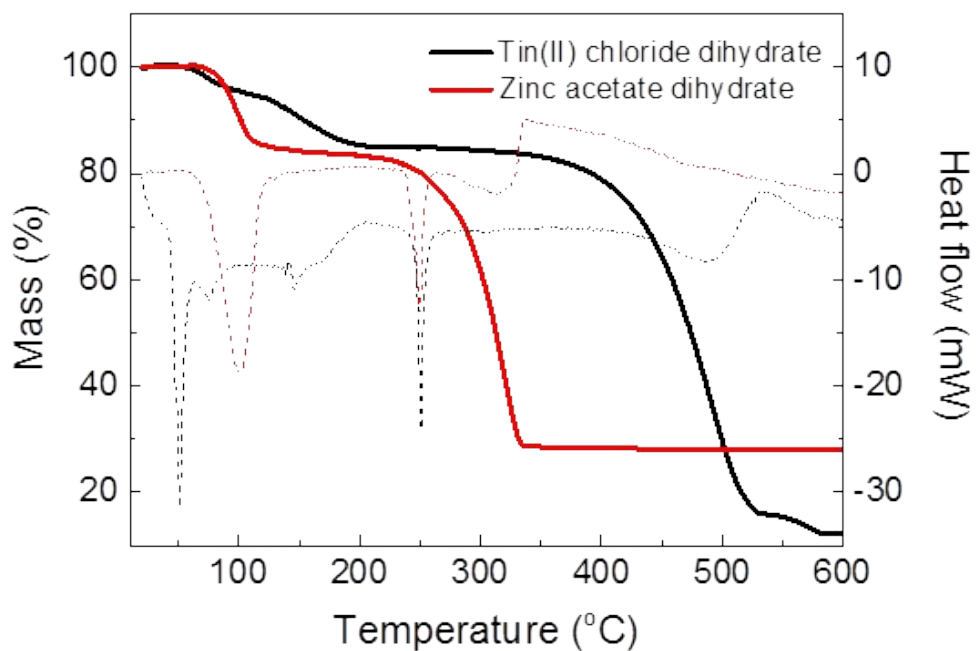

**Fig. S3** Thermogravimetric analysis (TGA) and differential scanning calorimetry (DSC) measurements obtained from the Sn and Zn precursors.

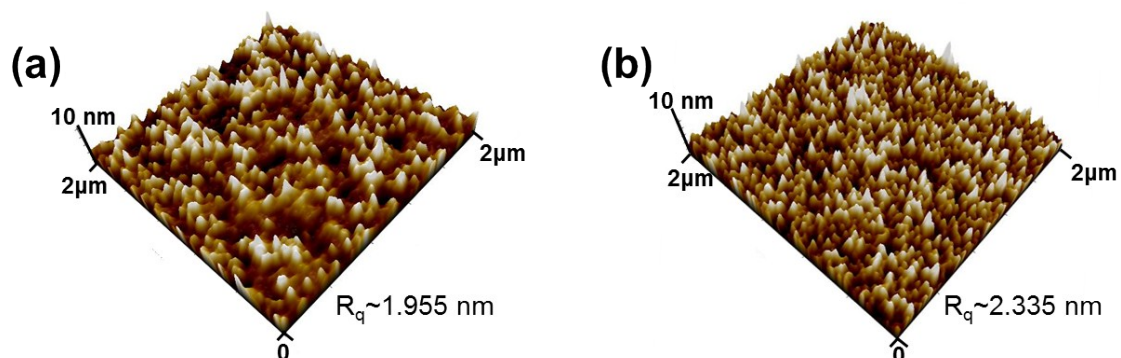

**Fig. S4** Atomic force microscopy (AFM) images obtained from the (a) ZTO and (b) ZnO/SnO<sub>2</sub> films.
